# Supplementary material for: Polypharmacy, over-the-counter medications, and aromatase inhibitor adherence in early-stage breast cancer
Source: Springer Nature journal article supplement (doi:10.1007/s10549-023-07218-1), 2024-01-10

# **A Randomized Controlled Trial of Polypharmacy in Early-Stage Breast Cancer**

*Breast Cancer Research and Treatment*

Elizabeth Joyce, MD, MSc<sup>1</sup>, ORCID 0000-0002-8133-2298

Xueting Tao MHS, MS<sup>2</sup>

Vered Stearns, MD<sup>3</sup>

Daniel F. Hayes, MD<sup>1</sup>

Anna Maria Storniolo, MD<sup>4</sup>

Kelley M. Kidwell, PhD<sup>2</sup>

N. Lynn Henry, MD, PhD<sup>1</sup>

## Author Affiliations:

<sup>1</sup> University of Michigan Medical School, Department of Internal Medicine, Ann Arbor, USA

<sup>2</sup> University of Michigan School of Public Health, Department of Biostatistics, Ann Arbor, USA

<sup>3</sup> Johns Hopkins University School of Medicine, Department of Internal Medicine, Baltimore, USA

<sup>4</sup> Indiana University School of Medicine, Department of Internal Medicine, Indianapolis, USA

Corresponding Author: N. Lynn Henry, MD, PhD  
University of Michigan Medical School  
norahh@umich.edu

**Supplemental Table 1: Medication groupings.** Examples of supplements and non-supplement over the counter (OTC) medications provided below the table. PRN: as-needed dosing

| Code | Category                                                            |
|------|---------------------------------------------------------------------|
| 0    | Prescriptions medications not in other categories                   |
| 1    | Supplements <sup>1,2</sup>                                          |
| 2    | Benzodiazepines                                                     |
| 3    | Selective serotonin reuptake inhibitors (SSRIs)                     |
| 4    | Selective serotonin and norepinephrine reuptake inhibitors (SNRIs)  |
| 5    | Non-steroidal anti-inflammatories (NSDAIDs)                         |
| 6    | Acetaminophen                                                       |
| 7    | GABA modulators                                                     |
| 8    | Opioid and opioid-combinations                                      |
| 9    | Aromatase inhibitors (AIs)                                          |
| 10   | Non-SSRI/SNRI antidepressants                                       |
| 11   | Antipsychotics                                                      |
| 12   | Sedative-hypnotics                                                  |
| 13   | Antiepileptic drugs (AEDs)                                          |
| 14   | Topical medications                                                 |
| 15   | Bisphosphonates                                                     |
| 17   | Stimulants                                                          |
| 18   | Chemotherapy                                                        |
| 19   | Muscle relaxants                                                    |
| 20   | Hormone replacement therapy (HRT)                                   |
| 21   | Herceptin                                                           |
| 22   | Topical lidocaine                                                   |
| 23   | Lithium                                                             |
| 24   | Melatonin                                                           |
| 25   | Tamoxifen                                                           |
| 30   | Statins                                                             |
| 31   | Metformin                                                           |
| 32   | Insulin                                                             |
| 33   | Other diabetes                                                      |
| 50   | Non-supplement <sup>1</sup> over the counter (OTC) prn <sup>3</sup> |
| 52   | Lidocaine prn <sup>4</sup>                                          |
| 54   | Melatonin prn                                                       |
| 55   | NSAIDs prn                                                          |
| 56   | Acetaminophen                                                       |
| 57   | Aspirin prn                                                         |

<sup>1</sup> Supplements were defined as compounds ingested for health that are not regulated by the Food and Drug Administration (FDA)

<sup>2</sup> Examples of supplements include, but are not limited to: multivitamin, calcium, vitamin D, magnesium hydroxide, glucosamine, omega-3 fatty acid, bilberry extract, lutein

<sup>3</sup> Examples of non-supplement OTC prns include, but are not limited to: antihistamines, loperamide, dextromethorphan, laxatives, saline nasal spray

<sup>4</sup> Lidocaine prn included lidocaine patches and topical lidocaine

**Supplemental Figure Legends:**

**Supplemental Figure 1: Consort diagram of study inclusion criteria.** *ELPh*: Exemestane and Letrozole Pharmacogenetics; AI: aromatase inhibitor

**Supplemental Figure 2: Discontinuation over time.** X-axis indicates months; Y-axis indicates probability of discontinuation. Number of patients at risk and number who discontinued (events) is below the x-axis

**Supplemental Figure 1**

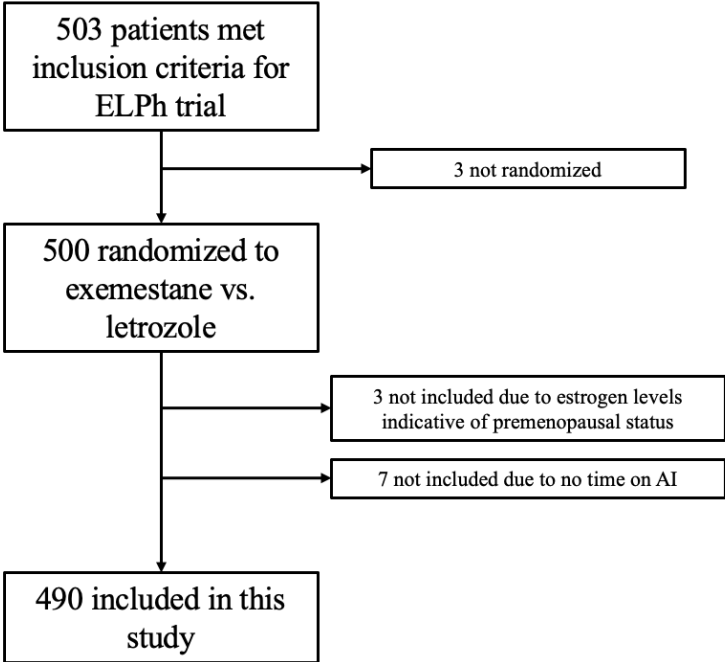

## Supplemental Figure 2

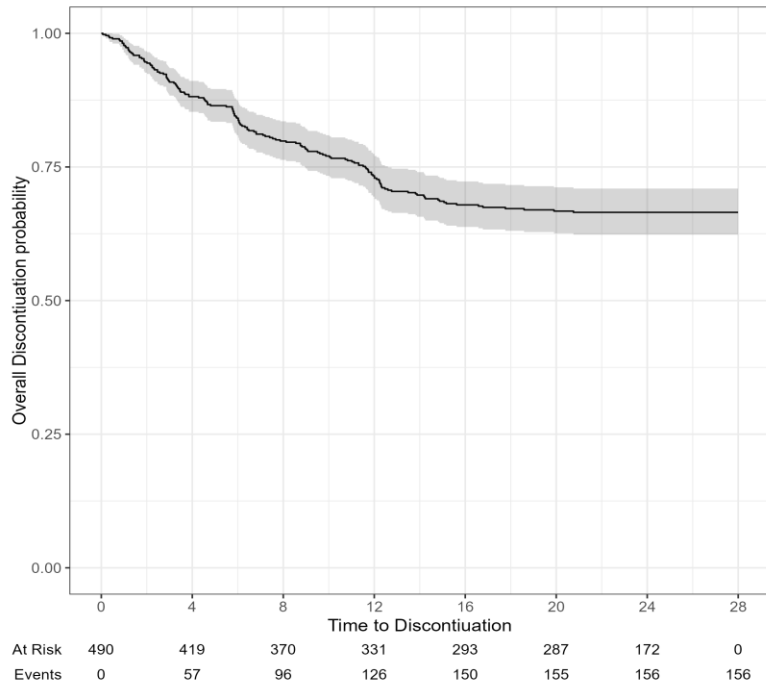

Supplement: 10549_2023_7218_MOESM1_ESM.pdf [file 10549_2023_7218_MOESM1_ESM.pdf]
